# Supplementary material
Source: Springer Nature journal article supplement (https://www.springermedizin.de/resource/supplementary/12957_2014_1720_MOESM6_ESM.pdf/9563264)

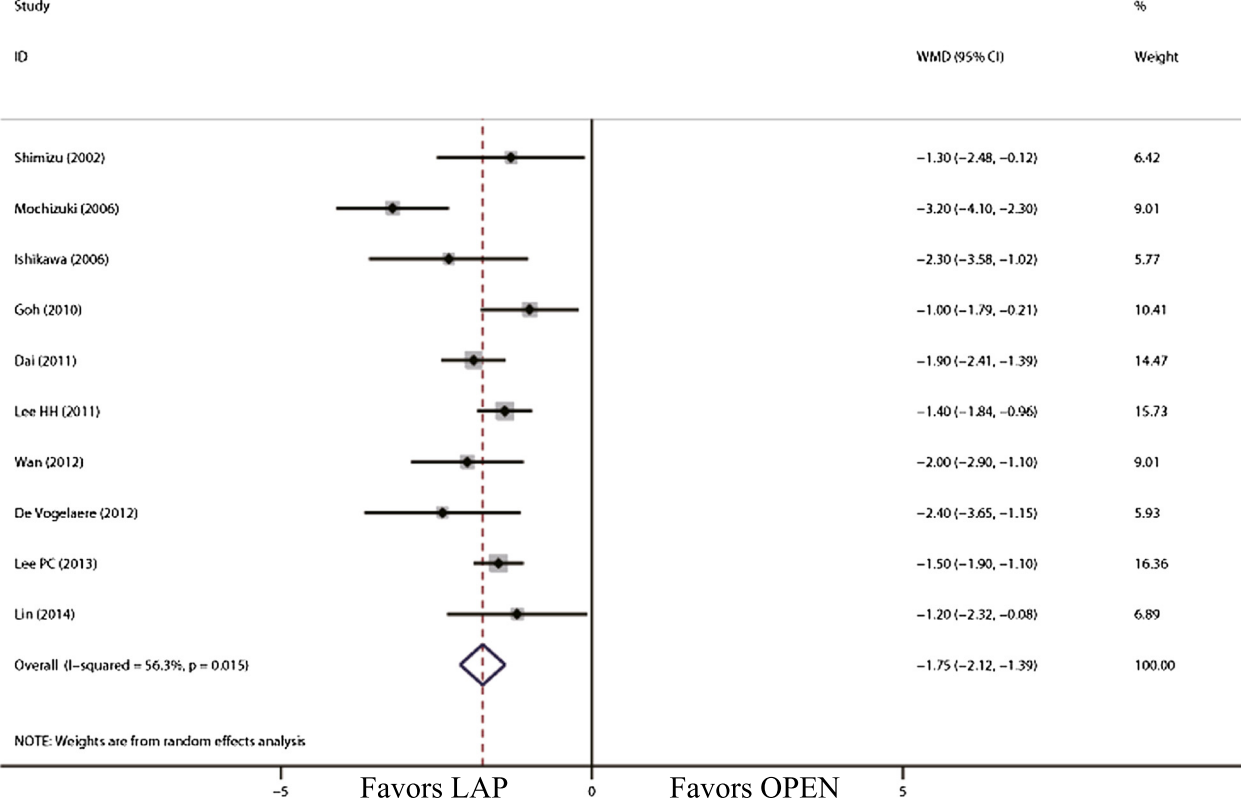

Supplement: MOESM6 [file 9563264]
